# Supplementary material for: A Study on Policy and Institutional Arrangements for Urban Green Space Development in Ulaanbaatar, Mongolia
Source: MDPI journal article supplement (doi:10.3390/land11122205), 2022-12-05
Supplement: s1 [file s1]

Supplementary Material

Table S1. Urban green space policy documents of Mongolia since 1990

| Issued year | Valid or rescinded | Type & name of document                                    | Issued and approved by                                                            | Provisions related to urban green space                                                                                                                                               |
|-------------|--------------------|------------------------------------------------------------|-----------------------------------------------------------------------------------|---------------------------------------------------------------------------------------------------------------------------------------------------------------------------------------|
| 2002        | Valid              | Law on Land                                                | Mongolian Parliament                                                              | 56.6. Landowners and land possessors should have GS no less than 10% of total parcel                                                                                                  |
| 2004        | Valid              | Norms and Rules of Urban Planning & Construction           | Ministry of Construction and Urban Planning                                       | GS must not be planned less than 40% of each construction site.                                                                                                                       |
| 2004        | Rescinded in       | Regulation of Encouraging greening activities              | Order by Ulaanbaatar City Governor                                                | It aims to provide fiscal support to the private entities and individuals who successfully made their parcels green.                                                                  |
| 2007        | Valid              | Regulation of urban green space use & conservation         | Citizens Representatives' Meeting of Ulaanbaatar City                             | Provisions about land allocation for green space, maintenance, funding, city governor's rights and duties, and responsibilities.                                                      |
| 2008        | Valid              | Law on Urban Development                                   | Mongolian Parliament                                                              | 12.6.3. At least 30% of each construction site must be designed for GS and parking lot.                                                                                               |
| 2010        | Valid              | President Degree for National Day for Tree Planting        | President of Mongolia (Elbegdorj Tsakhia)                                         | Second Saturday of May and October every year                                                                                                                                         |
| 2011        | Rescinded in 2021  | National Action Program on Climate Change                  | Mongolian Parliament                                                              | 3.2.7. To increase the share of green space in urban centralized and large cities and towns.                                                                                          |
| 2011        | Rescinded in 2021  | National Program on Water                                  | Mongolian Parliament                                                              | 3.4.11. Collecting roof water and using for watering urban green space.<br>3.4.12. Using greywater for watering urban green space                                                     |
| 2013        | Valid              | UB City Master Plan 2020 and Development Approach for 2030 | Formulated by Urban Planning and Research Institute and Approved by Parliament    | 15-20m <sup>2</sup> /capita by 2020<br><br>30m <sup>2</sup> /capita by 2030                                                                                                           |
| 2014        | Rescinded in 2021  | Green Development Policy of Mongolia                       | Prepared by Ministry of Environment and Green development, Approved by Parliament | 3.6.3. To increase the green area up to 15% by 2020 and 30% by 2030,<br>3.6.6. To increase the space for walking and cycling by improving the planning and organization of pedestrian |

|      |                   |                                                    |                                          |                                                                                                                                                                                                                                                                                                                                                                                                                                                                                                             |
|------|-------------------|----------------------------------------------------|------------------------------------------|-------------------------------------------------------------------------------------------------------------------------------------------------------------------------------------------------------------------------------------------------------------------------------------------------------------------------------------------------------------------------------------------------------------------------------------------------------------------------------------------------------------|
|      |                   |                                                    |                                          | crossings, green spaces, bicycle paths, and parking lots.                                                                                                                                                                                                                                                                                                                                                                                                                                                   |
| 2015 | Rescinded in 2021 | State Policy on Forest                             | Mongolian Parliament                     | 8.5. Ensuring the balance of the environment and the hygienic conditions of the population, the boundaries of the forests belonging to the green zone of the capital, city and village and their determination.                                                                                                                                                                                                                                                                                             |
| 2015 | Valid             | "Urbanization and Health" National Movement        | Resolution of the Government of Mongolia | 4.1.11. to create a healthy, safe and comfortable environment for children by increasing urban green space and building schools and kindergartens in accordance with the re-planning the public lands of cities and policy.<br>4.3.6. Within the framework of the "Ger Area Housing Project" in newly built and future residential neighborhoods, children's playgrounds, green spaces, paths for disabled people, bicycle paths, and public gymnasiums will be built according to standards and monitored. |
| 2016 | Ended in 2020     | Green Development Strategic Action Plan until 2020 | Municipality of Ulaanbaatar              | 1.5. To plant trees and increase grassland to increase carbon sink and reduce soil dust for cleaner air.                                                                                                                                                                                                                                                                                                                                                                                                    |
| 2016 | Rescinded in 2020 | Sustainable Development Concept-2030               | Mongolian Parliament                     | Objective 2. To improve urban planning, increase the quality and availability of infrastructures, develop good living habits for the population, and improve the quality of the environment and waste management.<br>Phase I (2016-2020): Increase the percentage of urban green spaces to 15%,<br>Phase II (2021-2025): Increase the percentage of urban green spaces to 25%,                                                                                                                              |

|      |                              |                                                                           |                                          |                                                                                                                                                                                                                                                                                                                                              |
|------|------------------------------|---------------------------------------------------------------------------|------------------------------------------|----------------------------------------------------------------------------------------------------------------------------------------------------------------------------------------------------------------------------------------------------------------------------------------------------------------------------------------------|
|      |                              |                                                                           |                                          | Phase III (2026-2030): Increase the percentage of urban green spaces to 30%.                                                                                                                                                                                                                                                                 |
| 2017 | Valid                        | “Environmental Health” National Program                                   | Resolution of the Government of Mongolia | Improve public health by mitigating environmental pollution by increasing the share of urban green space.                                                                                                                                                                                                                                    |
| 2019 | Valid                        | Mongolia’s Nationally Determined Contribution                             | Resolution of the Government of Mongolia | Carbon dioxide released in the air is reabsorbed by soil, plants and forests in large quantities. Therefore, by taking measures to increase the absorption of greenhouse gases in the land use and forestry sector, Mongolia can reduce its total greenhouse gas emissions by 33.9% by 2030.                                                 |
| 2019 | Valid                        | Ulaanbaatar City Development Concept up to 2040                           | Urban Planning and Research Institute    | The share of urban green space per capita will be 35-40m <sup>2</sup> in Ulaanbaatar city by 2040.                                                                                                                                                                                                                                           |
| 2019 | Valid                        | Green City Action Plan (GCAP)                                             | Municipality of Ulaanbaatar              | 0.12m <sup>2</sup> GS/person by 2017. In the first 5 years (by 2024), Share of GS per capita will be 2.4m <sup>2</sup>                                                                                                                                                                                                                       |
| 2020 | Under ratification procedure | New City Standards regarding urban green space                            | Municipality of Ulaanbaatar              | General requirements for urban green space planning in cities and towns, Requirements in the design of green spaces in residential areas, Requirements for the design of urban green structures, etc.                                                                                                                                        |
| 2020 | Under ratification procedure | New City Standards regarding the directory of species of trees and plants | Municipality of Ulaanbaatar              | A directory that describes the characteristics of ornamental trees and plants, and their growing environment and space requirements for urban green space planning.                                                                                                                                                                          |
| 2020 | Valid                        | Vision-2050, Mongolian Long-term Policy                                   | Mongolian Parliament                     | The 2 <sup>nd</sup> goal for “human development,” the 7 <sup>th</sup> goal for “peaceful and safe society,” and the 9 <sup>th</sup> goal for the establishment of Ulaanbaatar’s satellite cities are relevant to green space. These goals aim to introduce new standards for regulating this greenery. It also mentions a need for cities to |

|      |       |                                  |                     |                                                                                                                  |
|------|-------|----------------------------------|---------------------|------------------------------------------------------------------------------------------------------------------|
|      |       |                                  |                     | reuse rainwater and greywater for irrigating urban greenery.                                                     |
| 2021 | Valid | "Billion Trees" National Program | Mongolian President | It is one of the responses to mitigate Climate Change by planting 120 million trees in Ulaanbaatar city by 2030. |
